# Supplementary material
Source: PubMed Central journal article supplement (PMC3543135)
Supplement: 10.3163.1536-5050.101.1.009.sg001.pdf [file 10.3163.1536-5050.101.1.009.sg001.pdf]

## Infectious diseases citation patterns: mapping the literature 2008–2010

Melissa L. Rethlefsen, MLS, AHIP; Alicia A. Livinski, MPH, MA

**Table 4**  
Zone 2 titles from the Cited Journal Articles Sample (n=1,035)

| <b>Journal</b>                | <b>Times cited</b> | <b>Percent of total</b> | <b>Cumulative percent (starting after Zone 1 titles)</b> |
|-------------------------------|--------------------|-------------------------|----------------------------------------------------------|
| Epidemiol Infect              | 15                 | 1.4                     | 35.5                                                     |
| Am J Trop Med Hyg             | 13                 | 1.2                     | 36.7                                                     |
| Antimicrob Agents Chemother   | 13                 | 1.2                     | 37.9                                                     |
| MMWR Morb Mortal Wkly Rep     | 13                 | 1.2                     | 39.2                                                     |
| Proc Natl Acad Sci USA        | 12                 | 1.1                     | 40.3                                                     |
| Am J Respir Crit Care Med     | 10                 | 0.9                     | 41.2                                                     |
| Pediatr Infect Dis J          | 10                 | 0.9                     | 42.2                                                     |
| Clin Microbiol Rev            | 9                  | 0.8                     | 43.0                                                     |
| Nat Med                       | 9                  | 0.8                     | 43.9                                                     |
| Trans R Soc Trop Med Hyg      | 9                  | 0.8                     | 44.7                                                     |
| Ann Intern Med                | 8                  | 0.8                     | 45.5                                                     |
| Clin Exp Immunol              | 8                  | 0.8                     | 46.2                                                     |
| Hepatology                    | 8                  | 0.8                     | 47.0                                                     |
| J Antimicrob Chemother        | 8                  | 0.8                     | 47.7                                                     |
| J Med Virol                   | 8                  | 0.8                     | 48.5                                                     |
| J Bacteriol                   | 7                  | 0.7                     | 49.2                                                     |
| Nature                        | 7                  | 0.7                     | 49.8                                                     |
| Science                       | 7                  | 0.7                     | 50.5                                                     |
| BMJ                           | 6                  | 0.6                     | 51.0                                                     |
| J Exp Med                     | 6                  | 0.6                     | 51.6                                                     |
| Pediatrics                    | 6                  | 0.6                     | 52.2                                                     |
| Virology                      | 6                  | 0.6                     | 52.7                                                     |
| Am J Epidemiol                | 5                  | 0.5                     | 53.2                                                     |
| Am J Med                      | 5                  | 0.5                     | 53.7                                                     |
| Antivir Ther                  | 5                  | 0.5                     | 54.2                                                     |
| Blood                         | 5                  | 0.5                     | 54.6                                                     |
| Clin Microbiol Infect         | 5                  | 0.5                     | 55.1                                                     |
| Crit Care Med                 | 5                  | 0.5                     | 55.6                                                     |
| Eur J Immunol                 | 5                  | 0.5                     | 56.0                                                     |
| Infect Control Hosp Epidemiol | 5                  | 0.5                     | 56.5                                                     |
| J Gen Virol                   | 5                  | 0.5                     | 57.0                                                     |
| J Hepatol                     | 5                  | 0.5                     | 57.5                                                     |
| J Hosp Infect                 | 5                  | 0.5                     | 57.9                                                     |

| <b>Journal</b>              | <b>Times cited</b> | <b>Percent of total</b> | <b>Cumulative percent (starting after Zone 1 titles)</b> |
|-----------------------------|--------------------|-------------------------|----------------------------------------------------------|
| Trop Med Int Health         | 5                  | 0.5                     | 58.4                                                     |
| Vet Microbiol               | 5                  | 0.5                     | 58.9                                                     |
| AIDS Res Hum Retroviruses   | 4                  | 0.4                     | 59.2                                                     |
| Arch Intern Med             | 4                  | 0.4                     | 59.6                                                     |
| Arch Pediatr Adolesc Med    | 4                  | 0.4                     | 60.0                                                     |
| Bull World Health Org       | 4                  | 0.4                     | 60.4                                                     |
| Chest                       | 4                  | 0.4                     | 60.8                                                     |
| Euro Surveill               | 4                  | 0.4                     | 61.1                                                     |
| Gastroenterology            | 4                  | 0.4                     | 61.5                                                     |
| J Acquir Immune Defic Syndr | 4                  | 0.4                     | 61.9                                                     |
| J Med Microbiol             | 4                  | 0.4                     | 62.3                                                     |
| Lancet Infect Dis           | 4                  | 0.4                     | 62.6                                                     |
| Mol Microbiol               | 4                  | 0.4                     | 63.0                                                     |
| Sex Transm Dis              | 4                  | 0.4                     | 63.4                                                     |
| Tuberculosis                | 4                  | 0.4                     | 63.8                                                     |
